# Supplementary material
Source: PubMed Central journal article supplement (PMC5752592)
Supplement: NIHMS912460-supplement-1.pdf [file NIHMS912460-supplement-1.pdf]

Supplemental Figure 1

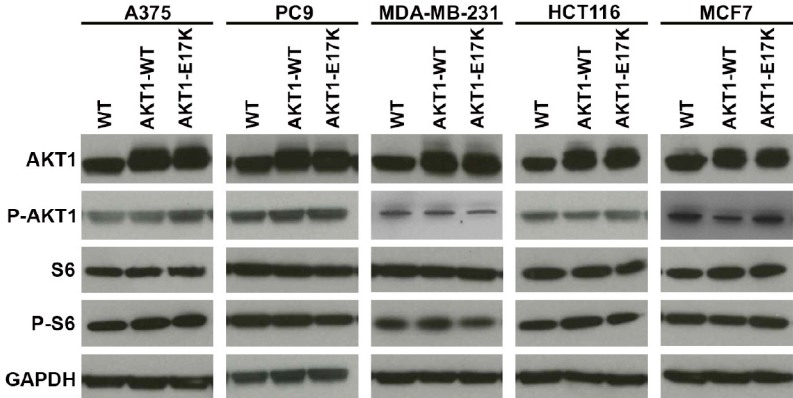

**Supp. Fig. 1. AKT1-WT, AKT1-E17K, and downstream signaling.** Immunoblots using indicated antibodies of lysates from cancer cell three days after induction of AKT1-WT or AKT1-E17K protein.
