# Supplementary material
Source: PubMed Central journal article supplement (PMC5752592)
Supplement: NIHMS912460-supplement-2.pdf [file NIHMS912460-supplement-2.pdf]

## Supplemental Figure 2

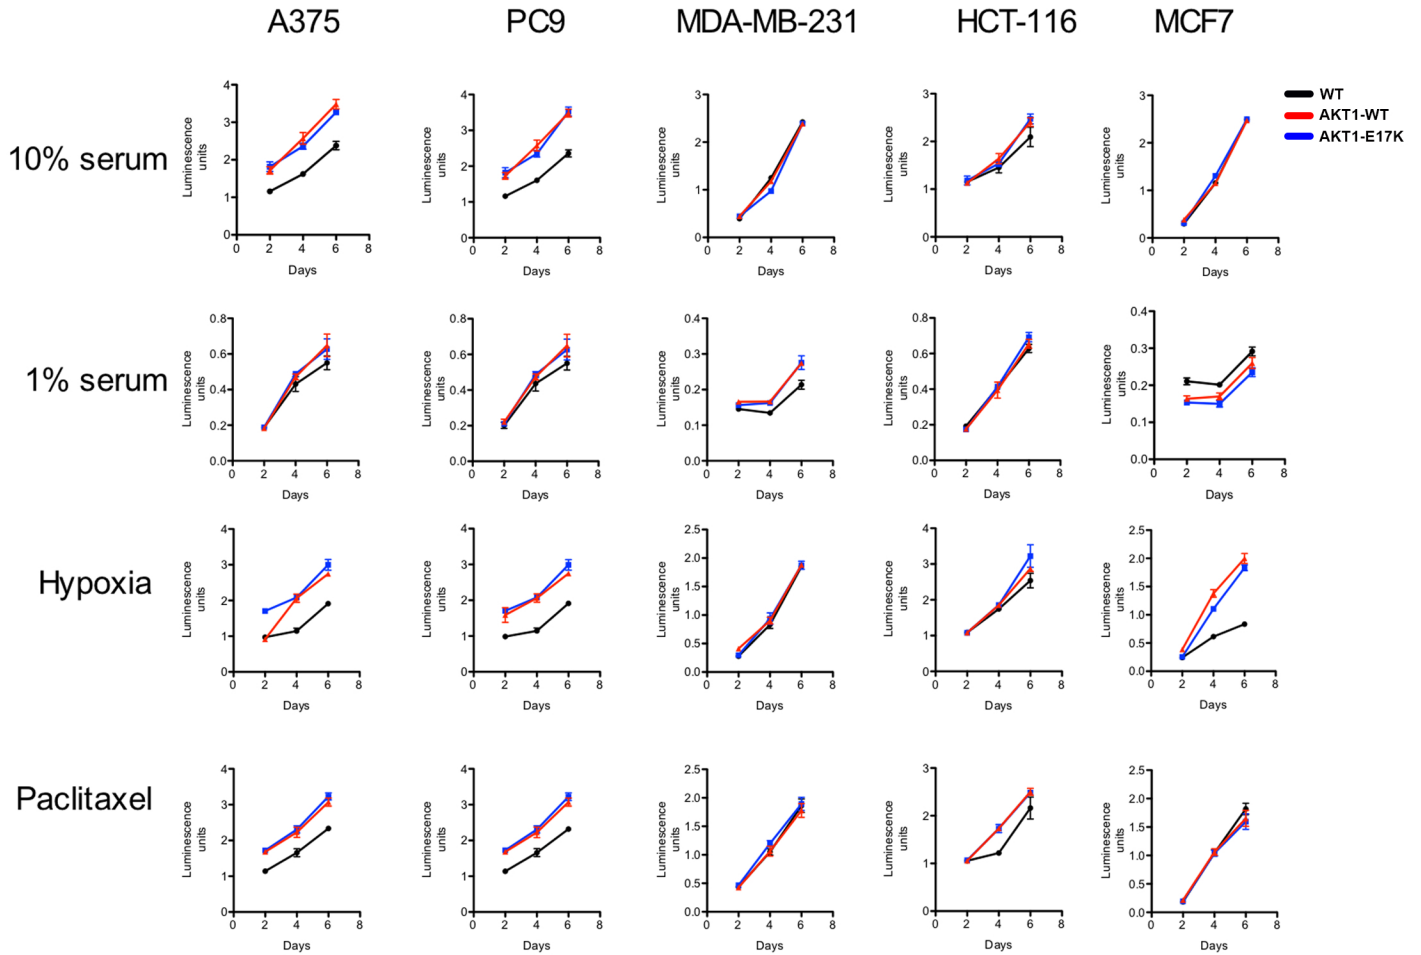

### Supp. Fig. 2. AKT1-WT versus AKT1-E17K: Functional assays in vitro (Part 1).

Proliferation assays performed three days after induction of AKT1-WT or AKT1-E17K protein under normal fetal bovine serum (10%), low serum (1%), hypoxia (4% O<sub>2</sub>), and with paclitaxel chemotherapy (0.5 μM). Error bars indicate mean ± SEM.
