# Supplementary material
Source: PubMed Central journal article supplement (PMC5752592)
Supplement: NIHMS912460-supplement-3.pdf [file NIHMS912460-supplement-3.pdf]

### Supplemental Figure 3

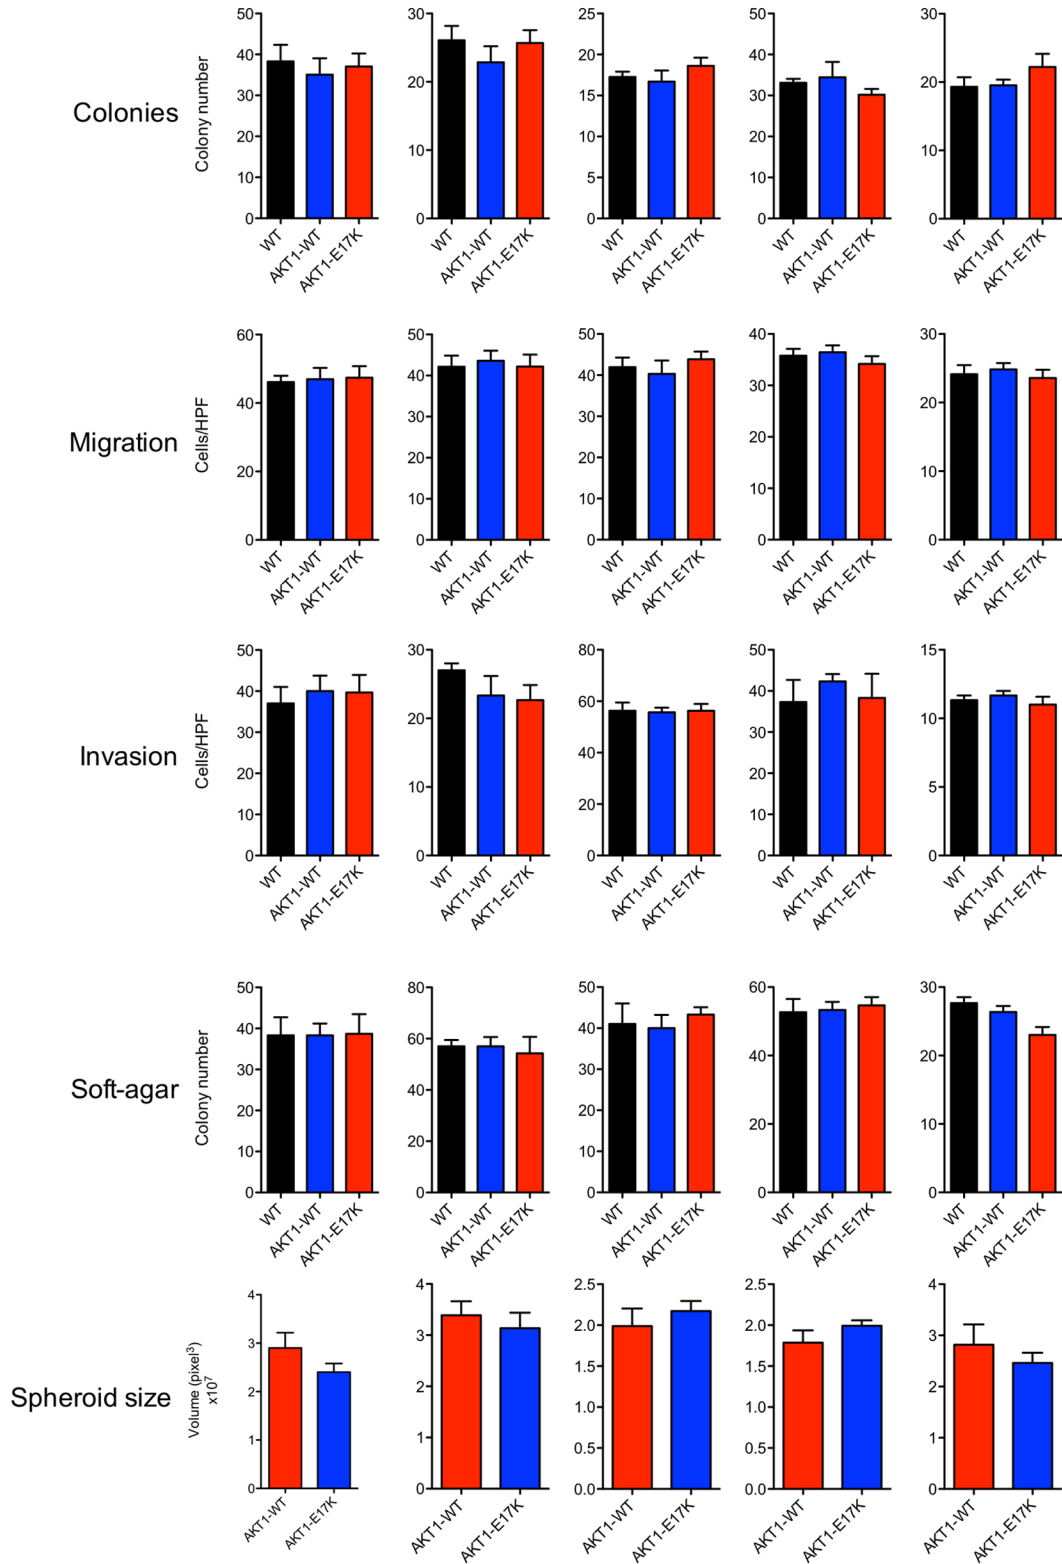

**Supp. Fig. 3. AKT1-WT versus AKT1-E17K: Functional assays in vitro (Part 2).** Bar plots for functional assays performed three days after induction of AKT1-WT or AKT1-E17K protein for colony formation (on plastic), migration, invasion (in matrigel), colony formation (soft-agar), or growth as multicellular tumor spheroids in suspension. Error bars indicate mean  $\pm$  SEM.
