# Supplementary material
Source: PubMed Central journal article supplement (PMC5752592)
Supplement: NIHMS912460-supplement-4.pdf [file NIHMS912460-supplement-4.pdf]

Supplemental Figure 4

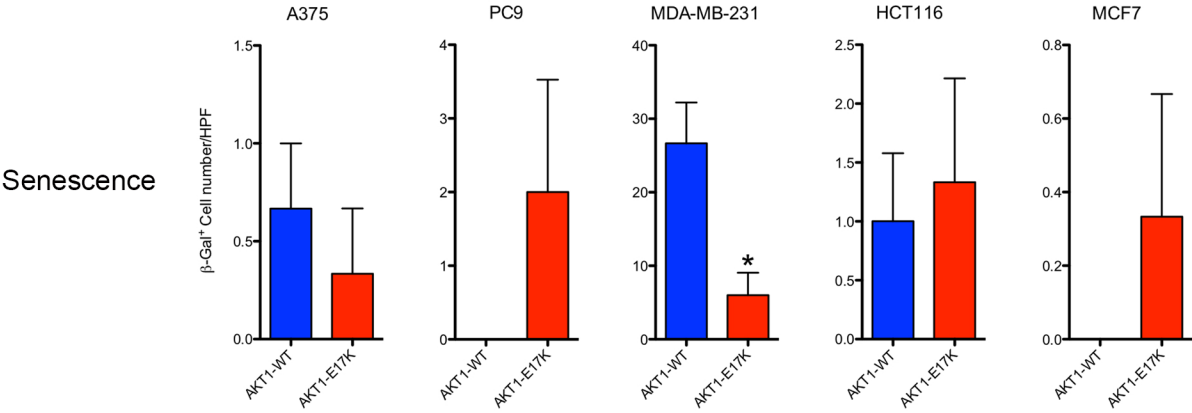

Supp. Fig. 4. Senescent cells in tumors. Number of senescent cells ( $\beta$ -Gal<sup>+</sup> cells) in different xenograft models. Error bars indicate mean  $\pm$  SEM.
