# Supplementary material
Source: PubMed Central journal article supplement (PMC5752592)
Supplement: NIHMS912460-supplement-5.pdf [file NIHMS912460-supplement-5.pdf]

## Supplemental Figure 5

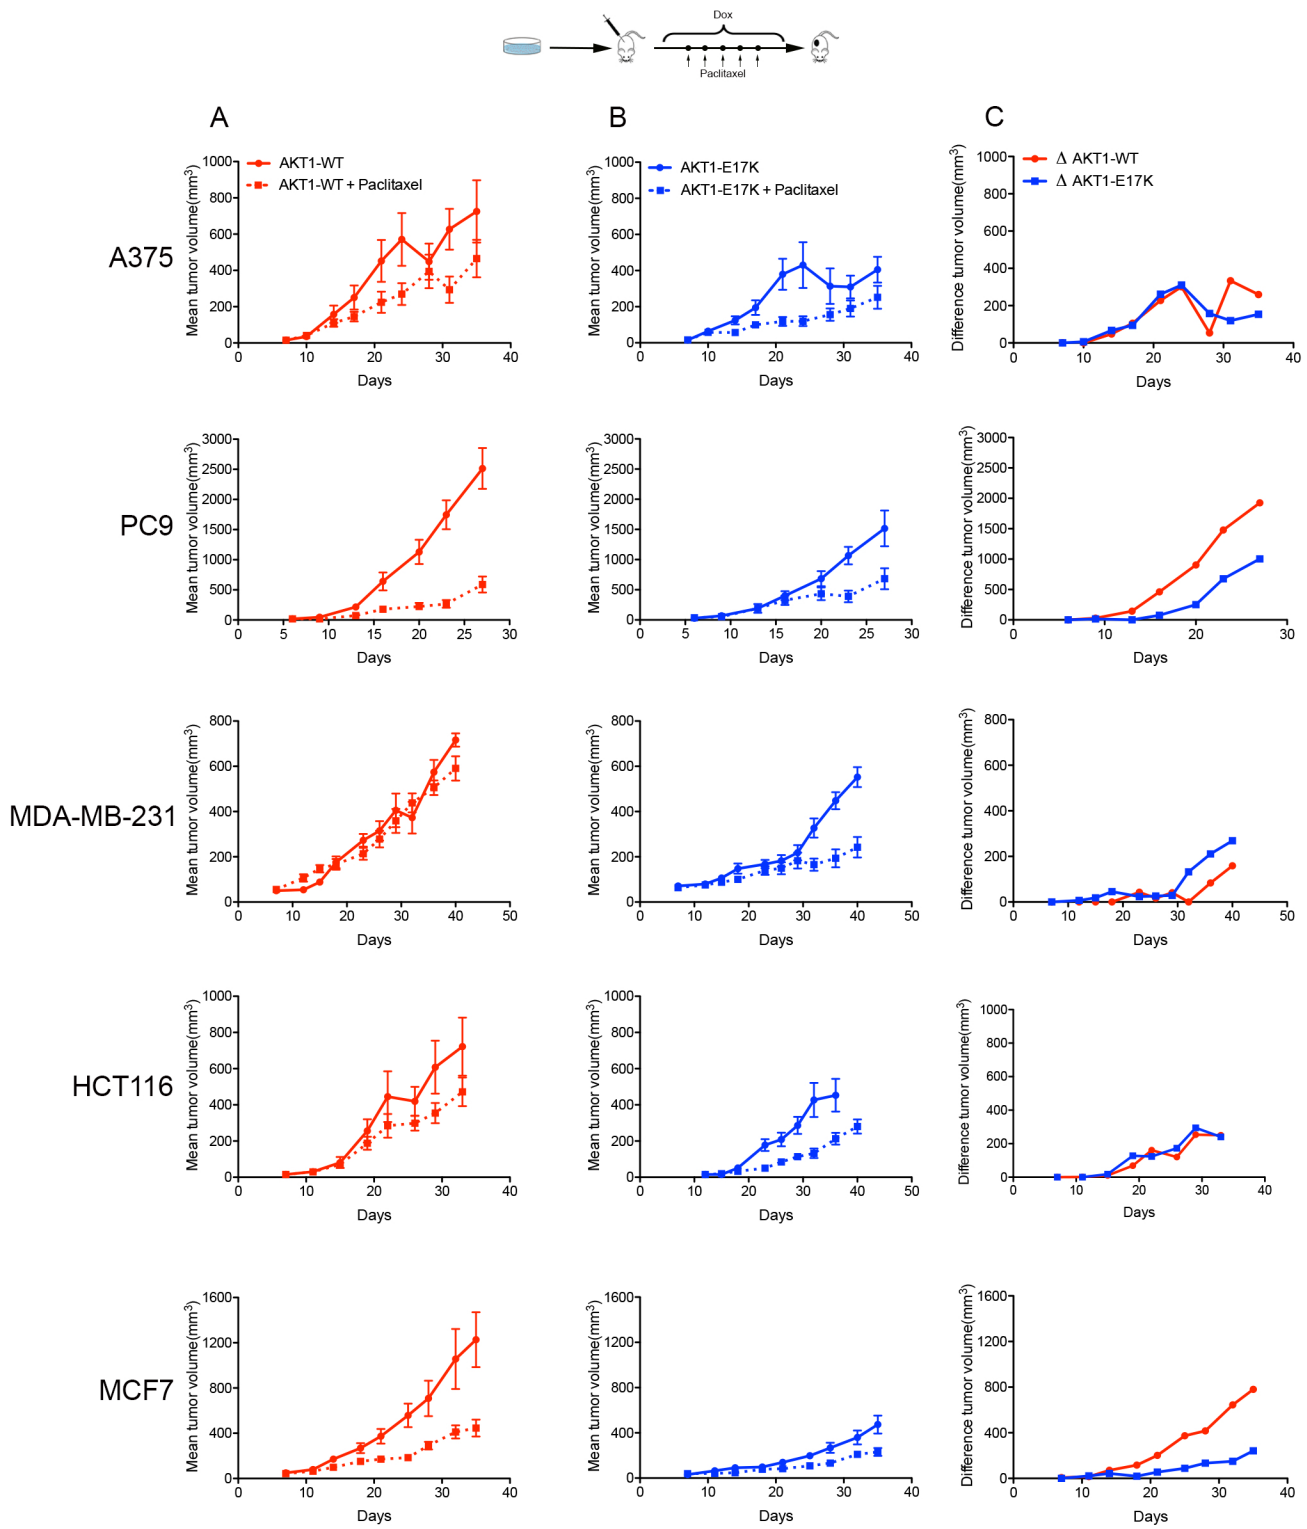

**Supp. Fig. 5. Sensitivity to Paclitaxel in AKT1-WT, AKT1-E17K xenographic tumors.** Mice with subcutaneous (A) AKT1-WT or (B) AKT1-E17K tumors were treated with paclitaxel. The ratio of treated and non-treated is shown in C.
